# Supplementary material
Source: PubMed Central journal article supplement (PMC5995566)
Supplement: NIHMS970410-supplement-Supplement.pdf [file NIHMS970410-supplement-Supplement.pdf]

1 Supplement: Conservation of specificity in two  
2 low-specificity proteins

3 Lucas C. Wheeler,<sup>1,2</sup> Jeremy A. Anderson<sup>1,2</sup>, Anneliese J. Morrison<sup>1,2</sup>,  
Caitlyn E. Wong<sup>1,2</sup>, Michael J. Harms<sup>1,2,\*</sup>

4 1. Department of Chemistry and Biochemistry, University of Oregon, Eugene, OR,  
5 USA

6 2. Institute of Molecular Biology, University of Oregon, Eugene, OR, USA

7 \* [harms@uoregon.edu](mailto:harms@uoregon.edu)

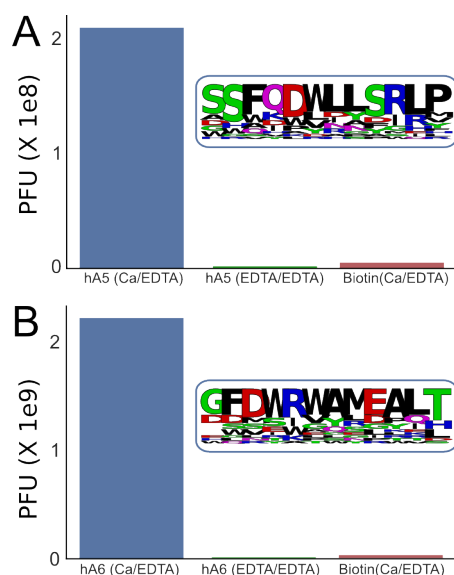

8

9 **Fig S1. Randomer phage enrichment is dependent on  $Ca^{2+}$  and protein.**

10 Bar graphs show the plaque forming units (PFU) for phage solutions after the third  
 11 round of enrichment for screens using hA5 (A) or hA6 (B). For each round of pan-  
 12 ning, we incubated phage with biotinylated protein, pulled down bound phage via  
 13 a streptavidin plate, and finally eluted the phage from the protein with an elution  
 14 buffer. To verify that binding occurred in a  $Ca^{2+}$ -dependent manner, we compared  
 15  $Ca^{+}$ -loading/*EDTA*-elution to *EDTA*-loading/*EDTA*-elution. We also performed  
 16 a  $Ca^{2+}$ -loading/*EDTA*-elution experiment using biotin alone. Insets show sequence  
 17 logos (WebLogo) generated from 20 plaque sequences from each  $Ca^{2+}$ /*EDTA* pan-  
 18 ning experiment. The most frequent residue at each position was used to generate  
 19 the A5cons and A6cons peptides.

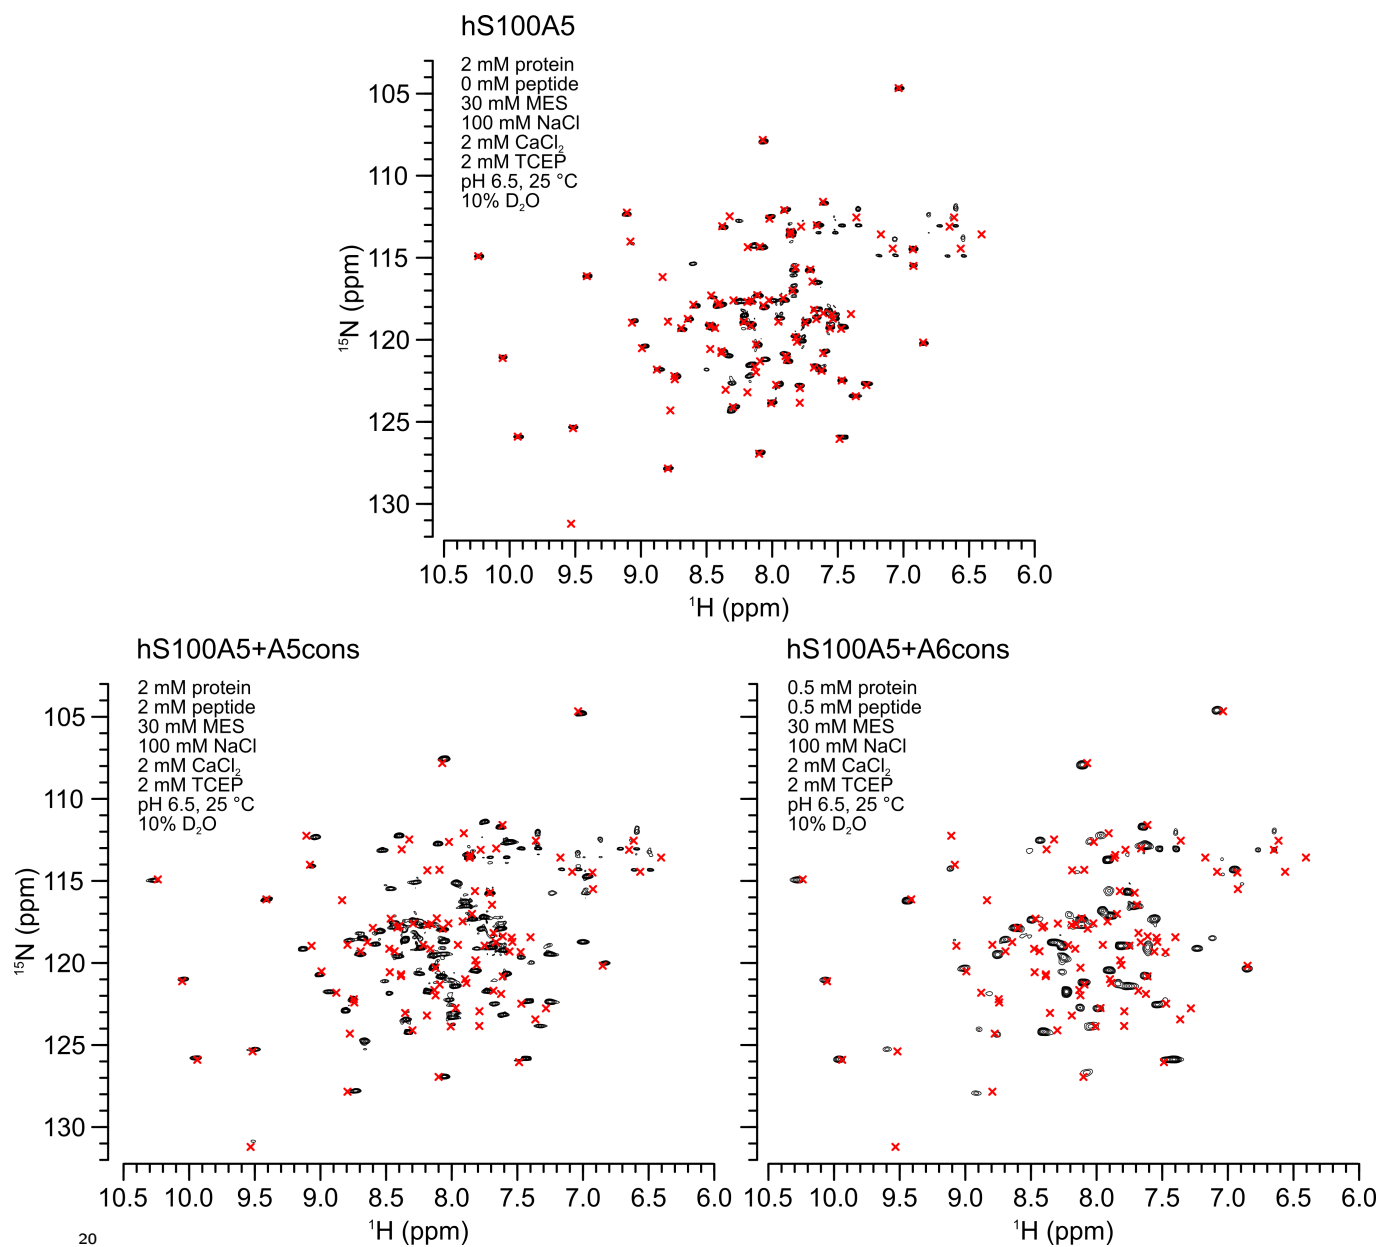

21 **Fig S2. Changes in HSQC spectra of hA5 with peptide binding.** 2D  
 22  $^1H-^{15}N$  TROSY-HSQC NMR spectra for hA5 alone or in the presence of saturating  
 23 A5cons or A6cons. Buffer conditions are on each plot. Assignments (red ×) are from  
 24 (1).

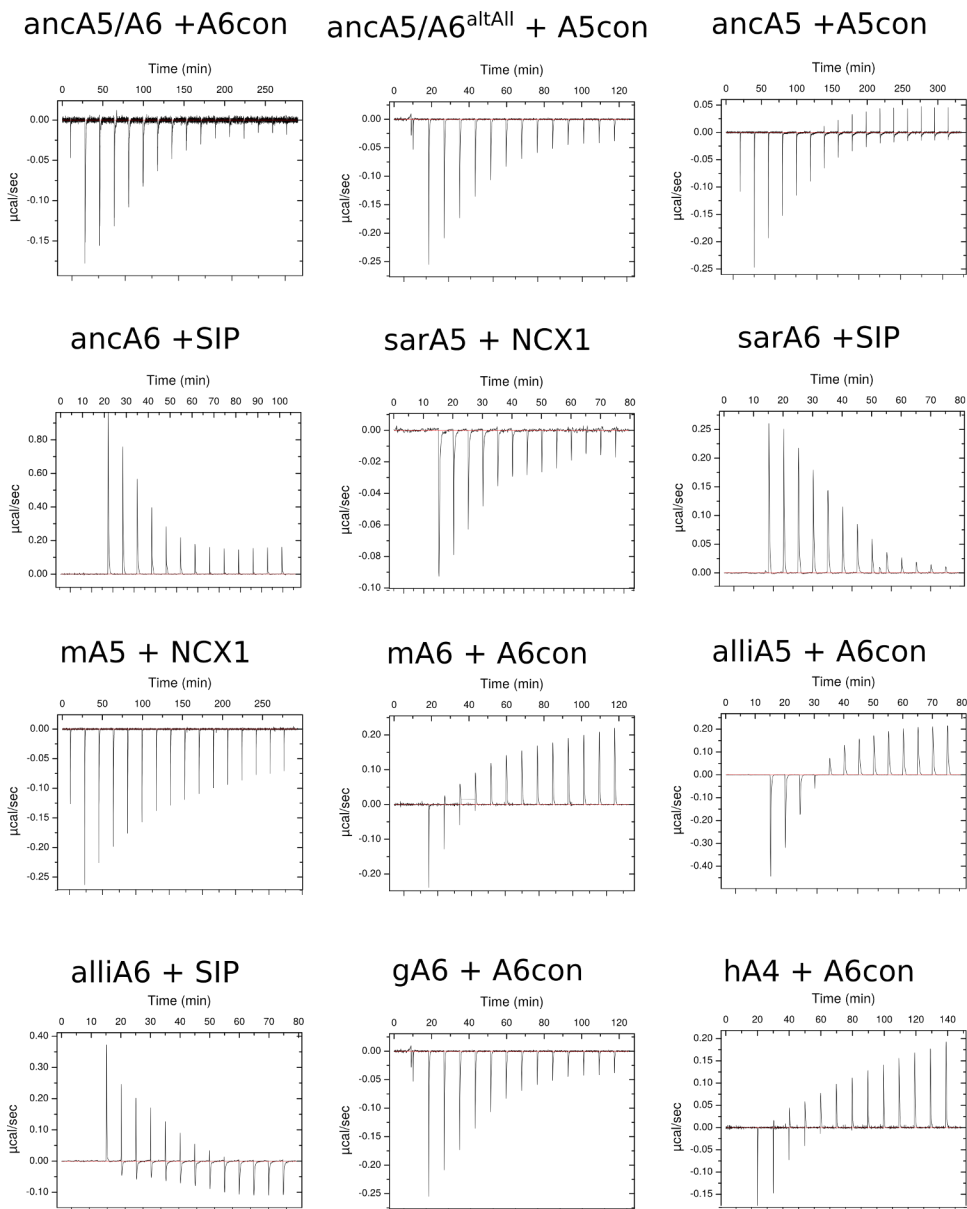

25

26 **Fig S3. Representative ITC data traces for each ancestor and ortholog.**

27 ITC traces show baseline-corrected titration of various peptides onto S100 proteins

28 in the presence of 2 *mM*  $Ca^{2+}$ . All experiments were done with  $\approx 100 \mu M$  protein

29 in 25 *mM* TES, 100 *mM* NaCl, 1 *mM* TCEP at *pH* 7.4, 25 °C.

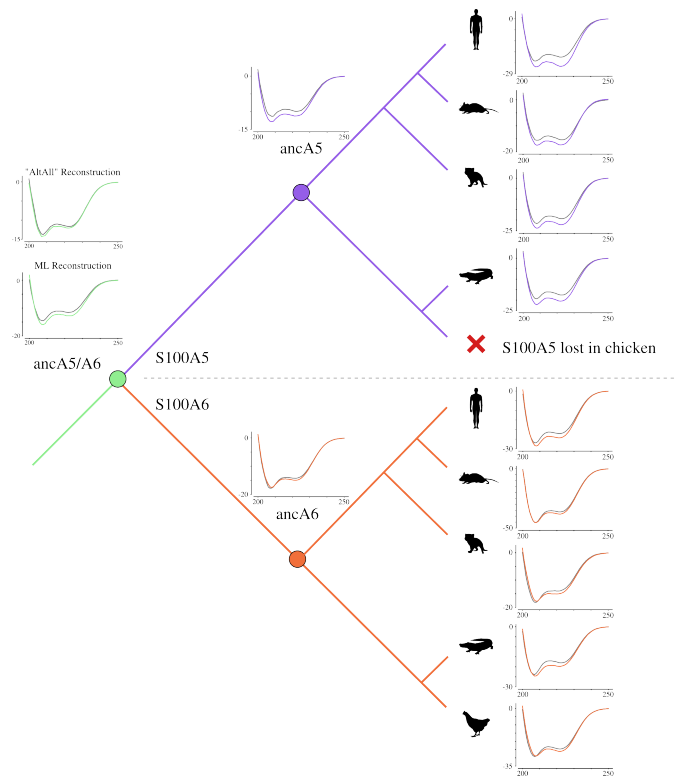

30

31 **Fig S4. Far UV CD spectra are diagnostic for the S100A5 and S100A6**  
 32 **clades.** CD spectra are mapped onto a diagram of the S100A5-S100A6 clade. Curves  
 33 are spectra of apo (gray) and  $\text{Ca}^{2+}$ -bound (orange/purple) proteins. The S100A5  
 34 proteins (purple) are characterized by a deep alpha-helical signal at 222nm that  
 35 substantially increases in response to binding of  $\text{Ca}^{2+}$ . S100A6 proteins (orange)  
 36 show comparatively minimal response and maintain a deeper peak at 208nm. These  
 37 patterns hold for the ancestors at the base of each clade. The spectra of ancA5/A6  
 38 and the ancA5/A6 altAll version (both shown in green) resemble that of an extant  
 39 S100A6, indicating that the large  $\text{Ca}^{2+}$ -driven conformational change seen in the  
 40 extant S100A5s is a derived feature of this lineage.

41 **Table S1.** Accession numbers of S100 proteins used to build the multiple sequence  
 42 alignment.

|    | paralog | accession      | species                         |
|----|---------|----------------|---------------------------------|
|    | A1      | F1R758         | <i>Danio rerio</i>              |
|    | A1      | A5WW32         | <i>Danio rerio</i>              |
|    | A1      | H2TQM5         | <i>Takifugu rubripes</i>        |
|    | A1      | H2ST19         | <i>Takifugu rubripes</i>        |
|    | A1      | H2L492         | <i>Oryzias latipes</i>          |
|    | A1      | H2M1B8         | <i>Oryzias latipes</i>          |
|    | A1      | G3NKS0         | <i>Gasterosteus aculeatus</i>   |
|    | A1      | G3PEI0         | <i>Gasterosteus aculeatus</i>   |
|    | A2      | P29034         | <i>Homo sapiens</i>             |
|    | A2      | F6Q7Q8         | <i>Ornithorhynchus anatinus</i> |
|    | A2      | P10462         | <i>Bos taurus</i>               |
|    | A2      | G3W672         | <i>Sarcophilus harrisii</i>     |
|    | A2      | JH205580.1     | <i>Pelodiscus sinensis</i>      |
|    | A3      | P33764         | <i>Homo sapiens</i>             |
|    | A3      | P62818         | <i>Mus musculus</i>             |
|    | A3      | A4FUH7         | <i>Bos taurus</i>               |
|    | A3      | G3W5T7         | <i>Sarcophilus harrisii</i>     |
|    | A3      | F6SL13         | <i>Monodelphis domestica</i>    |
|    | A3      | F6Q7S6         | <i>Ornithorhynchus anatinus</i> |
|    | A3      | JH205580.1     | <i>Pelodiscus sinensis</i>      |
|    | A4      | P35466         | <i>Bos saurus</i>               |
|    | A4      | predicted*     | <i>Crocodylus porosus</i>       |
|    | A4      | P26447         | <i>Homo sapiens</i>             |
| 43 | A4      | H0Z1G5         | <i>Taeniopygia guttata</i>      |
|    | A4      | P07091         | <i>Mus musculus</i>             |
|    | A4      | F6SKU1         | <i>Monodelphis domestica</i>    |
|    | A4      | F6Q7T6         | <i>Ornithorhynchus anatinus</i> |
|    | A4      | XP_015743713.1 | <i>Python bivittatus</i>        |
|    | A4      | JH205580.1     | <i>Pelodiscus sinensis</i>      |
|    | A4      | G3W5H2         | <i>Sarcophilus harrisii</i>     |
|    | A4      | H9H0S2         | <i>Meleagris gallopavo</i>      |
|    | A5      | P33763         | <i>Homo sapiens</i>             |
|    | A5      | P63084         | <i>Mus musculus</i>             |
|    | A5      | E1B8S0         | <i>Bos taurus</i>               |
|    | A5      | G3W581         | <i>Sarcophilus harrisii</i>     |
|    | A5      | XP_019412310.1 | <i>Crocodylus porosus</i>       |
|    | A5      | JH205580.1     | <i>Pelodiscus sinensis</i>      |
|    | A6      | P06703         | <i>Homo sapiens</i>             |
|    | A6      | P14069         | <i>Mus musculus</i>             |
|    | A6      | F6SKR4         | <i>Monodelphis domestica</i>    |
|    | A6      | F6R394         | <i>Ornithorhynchus anatinus</i> |
|    | A6      | G3W4S8         | <i>Sarcophilus harrisii</i>     |
|    | A6      | H9H0S3         | <i>Meleagris gallopavo</i>      |
|    | A6      | XP_019412316.1 | <i>Crocodylus porosus</i>       |
|    | A6      | Q98953         | <i>Gallus gallus</i>            |
|    | A6      | EOB07085.1     | <i>Anas platyrhynchos</i>       |
|    | A6      | XP_015284753.1 | <i>Gekko japonicus</i>          |
|    | A6      | XP_007429160.1 | <i>Python bivittatus</i>        |
|    | A6      | JH205580.1     | <i>Pelodiscus sinensis</i>      |

44 \* Unannotated BLAST hit from the *Crocodylus porosus* genome (GB2012 version). **Table S2.**

45 **Binding of 12-mer phage display peptides does not depend on**  
46 **solubilizing flanks.** List of phage display consensus peptides used in the study.  
47 The sequences of flank variants of A5cons and A6cons are shown. Flanks are  
48 indicated by lower-case letters. The third column shows dissociation constants for  
49 peptides binding to hA5 with 95% credibility regions from Bayesian fits of one ITC  
50 dataset per variant. Flank variants bind with similar  $K_D$ .

| Peptide Name          | Amino Acid Sequence    | $K_D(\mu M)$             |
|-----------------------|------------------------|--------------------------|
| A5cons (variant 1)    | rshsSSFQDWLLSRLPgggsae | $4.9 \leq 6.1 \leq 7.8$  |
| 51 A5cons (variant 2) | ----SSFQDWLLSRLP-ggsae | $1.1 \leq 2.8 \leq 7.9$  |
| A5cons (variant 3)    | rshsSSFQDWLLSRLP-----  | $7.2 \leq 9.6 \leq 13.1$ |
| A6cons (variant 1)    | rshsGFDWRWGMEALTgggsae | $0.3 \leq 0.9 \leq 2.4$  |
| 52 A6cons (variant 2) | ----GFDWRWGMEALT-ggsae | $1.5 \leq 2.5 \leq 4.0$  |

53

54 **Table S3. Thermodynamic parameters for binding of the peptide rshs-**  
55 **GFDWRWAMEALTggsae (A6cons) to S100A5 and S100A6 proteins.** Species  
56 abbreviations are “alli” (alligator), “gal” (chicken), “sar” (tasmanian devil), “m” (mouse),  
57 and “h” (human). Fit parameters, with standard deviation from fits, for to the data  
58 shown schematically in Fig 4A. Parameters are for a single-site binding model. “NA”  
59 indicates that there was no detectable binding. We floated the fraction competent  
60 parameter to capture uncertainty in peptide and protein concentration, particularly  
61 given the low extinction coefficients of S100A5 and S100A6. If an experiment was  
62 done at both 10 and 25 °C, the parameters correspond to the 10 °C experiment.

63

64

| protein  | $K_A$ ( $M^{-1}$ ) | $\Delta H^\circ$ ( $kcal/mol$ ) | $fx$ comp.      | num reps | $T$ ( $^\circ C$ ) |
|----------|--------------------|---------------------------------|-----------------|----------|--------------------|
| ancA5/A6 | $8.30e5 \pm 1.9e5$ | $-12.20 \pm 1.2$                | $0.70 \pm 0.02$ | 2        | 25                 |
| altAll   | $1.10e5 \pm 5.2e4$ | $-8.70 \pm 0.6$                 | $0.90 \pm 0.07$ | 2        | 25                 |
| ancA5    | $7.70e5 \pm 2.1e5$ | $-3.30 \pm 0.8$                 | $0.80 \pm 0.07$ | 2        | 25                 |
| alliA5   | $4.40e5 \pm 6.8e4$ | $-10.60 \pm 0.7$                | $0.70 \pm 0.01$ | 2        | 25                 |
| sarA5    | $2.50e5 \pm 1.6e5$ | $-5.90 \pm 2.5$                 | $0.90 \pm 0.13$ | 2        | 25                 |
| mA5      | $2.10e5 \pm 5.4e4$ | $-11.70 \pm 2.7$                | $1.10 \pm 0.05$ | 2        | 25                 |
| hA5      | $4.10e5 \pm 9.8e4$ | $-8.50 \pm 1.5$                 | $1.00 \pm 0.02$ | 2        | 25                 |
| ancA6    | $2.80e5 \pm 1.9e5$ | $-6.40 \pm 2.7$                 | $1.10 \pm 0.14$ | 2        | 25                 |
| alliA6   | $9.50e4 \pm 4.7e4$ | $-10.40 \pm 3.7$                | $0.60 \pm 0.09$ | 2        | 25                 |
| gA6      | $4.20e5 \pm 2.0e5$ | $-8.10 \pm 2.0$                 | $0.70 \pm 0.06$ | 2        | 25                 |
| sarA6    | $1.40e5 \pm 6.7e4$ | $-6.20 \pm 1.9$                 | $0.80 \pm 0.10$ | 2        | 25                 |
| mA6      | $2.60e5 \pm 1.2e5$ | $-6.40 \pm 1.5$                 | $0.60 \pm 0.05$ | 2        | 25                 |
| hA6      | $2.00e5 \pm 4.8e4$ | $9.60 \pm 1.4$                  | $0.80 \pm 0.02$ | 2        | 25                 |
| hA4      | $2.80e6 \pm 6.5e6$ | $-1.80 \pm 0.5$                 | $0.60 \pm 0.04$ | 2        | 25                 |

66

67



68 **Table S4. Thermodynamic parameters for binding of the peptide rshsSS-**  
69 **FQDWLLSRLPgggsae (A5cons) to S100A5 and S100A6 proteins.** Species  
70 abbreviations are “alli” (alligator), “gal” (chicken), “sar” (tasmanian devil), “m” (mouse),  
71 and “h” (human). Fit parameters, with standard deviation from fits, for to the data  
72 shown schematically in Fig 4A. Parameters are for a single-site binding model. “NA”  
73 indicates that there was no detectable binding. We floated the fraction competent  
74 parameter to capture uncertainty in peptide and protein concentration, particularly  
75 given the low extinction coefficients of S100A5 and S100A6. If an experiment was  
76 done at both 10 and 25 °C, the parameters correspond to the 10 °C experiment.

77

| protein  | $K_A$ ( $M^{-1}$ ) | $\Delta H^\circ$ ( $kcal/mol$ ) | $fx$ comp.      | num reps | $T$ ( $^\circ C$ ) |
|----------|--------------------|---------------------------------|-----------------|----------|--------------------|
| ancA5/A6 | $9.30e4 \pm 3.0e4$ | $-5.20 \pm 1.6$                 | $1.40 \pm 0.07$ | 2        | 25                 |
| altAll   | $4.70e4 \pm 2.2e4$ | $-3.90 \pm 1.3$                 | $1.30 \pm 0.19$ | 2        | 25                 |
| ancA5    | $1.30e5 \pm 3.6e4$ | $-6.90 \pm 1.3$                 | $0.90 \pm 0.05$ | 2        | 10, 25             |
| alliA5   | $2.30e4 \pm 3.8e3$ | $13.80 \pm 2.4$                 | $1.10 \pm 0.07$ | 2        | 10, 25             |
| sarA5    | $2.10e5 \pm 1.5e5$ | $-4.80 \pm 1.9$                 | $0.70 \pm 0.1$  | 2        | 25                 |
| mA5      | $4.70e4 \pm 1.9e4$ | $-6.90 \pm 2.1$                 | $0.60 \pm 0.08$ | 2        | 25                 |
| 78 hA5   | $3.60e5 \pm 2.1e5$ | $-5.70 \pm 1.7$                 | $0.80 \pm 0.06$ | 2        | 25                 |
| ancA6    | NA                 | NA                              | NA              | 2        | 10, 25             |
| alliA6   | NA                 | NA                              | NA              | 2        | 25                 |
| gA6      | NA                 | NA                              | NA              | 2        | 25                 |
| sarA6    | NA                 | NA                              | NA              | 2        | 10, 25             |
| mA6      | NA                 | NA                              | NA              | 2        | 25                 |
| hA6      | NA                 | NA                              | NA              | 2        | 25                 |
| 79 hA4   | $1.70e4 \pm 5.1e3$ | $-4.10 \pm 0.8$                 | $0.90 \pm 0.3$  | 2        | 25                 |

80

81 **Table S5. Thermodynamic parameters for binding of the peptide RRL-**  
82 **FYKYVYKR (NCX1) to S100A5 and S100A6 proteins.** Species abbrevi-  
83 ations are “alli” (alligator), “gal” (chicken), “sar” (tasmanian devil), “m” (mouse),  
84 and “h” (human). Fit parameters, with standard deviation from fits, for to the data  
85 shown schematically in Fig 4A. Parameters are for a single-site binding model. “NA”  
86 indicates that there was no detectable binding. We floated the fraction competent  
87 parameter to capture uncertainty in peptide and protein concentration, particularly  
88 given the low extinction coefficients of S100A5 and S100A6. If an experiment was  
89 done at both 10 and 25 °C, the parameters correspond to the 10 °C experiment. (\*)  
90 Data from ancA5 binding to NCX1 were difficult to fit. The binding curves for this  
91 interaction had shallow curvature and did not appear to reach baseline saturation  
92 even in with higher titrant/titrate molar ratio, leading to the high fraction competent.

93

| protein  | $K_A$ ( $M^{-1}$ ) | $\Delta H^\circ$ ( $kcal/mol$ ) | $fx$ comp.      | num reps | $T$ ( $^\circ C$ ) |
|----------|--------------------|---------------------------------|-----------------|----------|--------------------|
| ancA5/A6 | $3.3e4 \pm 7.6e3$  | $-1.70 \pm 0.3$                 | $0.60 \pm 0.05$ | 2        | 25                 |
| altAll   | $2.3e4 \pm 8.3e3$  | $-3.80 \pm 1.2$                 | $0.60 \pm 0.05$ | 2        | 25                 |
| ancA5*   | $1.98e5 \pm 1.7e5$ | $-0.68 \pm 0.4$                 | $2.90 \pm 0.20$ | 2        | 10                 |
| alliA5   | $5.80e3 \pm 1.6e3$ | $-7.20 \pm 2.0$                 | $0.90 \pm 0.26$ | 2        | 10, 25             |
| sarA5    | $2.50e4 \pm 1.7e4$ | $-2.80 \pm 1.3$                 | $0.70 \pm 0.20$ | 2        | 25                 |
| mA5      | $1.20e5 \pm 1.7e5$ | $-1.30 \pm 0.5$                 | $0.80 \pm 0.20$ | 2        | 25                 |
| 94 hA5   | $5.50e4 \pm 1.3e4$ | $-3.60 \pm 0.9$                 | $1.40 \pm 0.10$ | 2        | 25                 |
| ancA6    | NA                 | NA                              | NA              | 2        | 10, 25             |
| alliA6   | $4.60e4 \pm 3.3e4$ | $-2.50 \pm 0.2$                 | $0.70 \pm 0.15$ | 2        | 10, 25             |
| gA6      | $1.10e5 \pm 1.7e4$ | $3.40 \pm 0.6$                  | $1.70 \pm 0.05$ | 2        | 25                 |
| sarA6    | $1.30e4 \pm 5.8e3$ | $-4.30 \pm 1.8$                 | $0.90 \pm 0.30$ | 2        | 25                 |
| mA6      | NA                 | NA                              | NA              | 2        | 25                 |
| hA6      | NA                 | NA                              | NA              | 2        | 25                 |
| 95 hA4   | NA                 | NA                              | NA              | 2        | 25                 |

96 **Table S6. Thermodynamic parameters for binding of the peptide SEGLM-**  
97 **NVLKKIYEDG (SIP) to S100A5 and S100A6 proteins.** Species abbrevia-  
98 tions are “alli” (alligator), “gal” (chicken), “sar” (tasmanian devil), “m” (mouse), and  
99 “h” (human). Fit parameters, with standard deviation from fits, for to the data  
100 shown schematically in Fig 4A. Parameters are for a single-site binding model. “NA”  
101 indicates that there was no detectable binding. We floated the fraction competent  
102 parameter to capture uncertainty in peptide and protein concentration, particularly  
103 given the low extinction coefficients of S100A5 and S100A6. If an experiment was  
104 done at both 10 and 25 °C, the parameters correspond to the 10 °C experiment.

105

| protein  | $K_A$ ( $M^{-1}$ ) | $\Delta H^\circ$ ( $kcal/mol$ ) | $fx$ comp.      | num reps | $T$ ( $^\circ C$ ) |
|----------|--------------------|---------------------------------|-----------------|----------|--------------------|
| ancA5/A6 | $1.30e4 \pm 1.7e3$ | $-8.10 \pm 0.9$                 | $1.50 \pm 0.01$ | 2        | 25                 |
| altAll   | $2.40e4 \pm 1.2e4$ | $-1.50 \pm 0.5$                 | $1.30 \pm 0.20$ | 2        | 25                 |
| ancA5    | NA                 | NA                              | NA              | 2        | 25                 |
| alliA5   | NA                 | NA                              | NA              | 2        | 10, 25             |
| sarA5    | NA                 | NA                              | NA              | 2        | 25                 |
| mA5      | NA                 | NA                              | NA              | 2        | 25                 |
| 106 hA5  | NA                 | NA                              | NA              | 2        | 25                 |
| ancA6    | $3.90e4 \pm 3.0e2$ | $3.80 \pm 0.3$                  | $1.20 \pm 0.02$ | 2        | 10, 25             |
| alliA6   | $3.00e4 \pm 9.3e3$ | $3.20 \pm 0.7$                  | $1.40 \pm 0.09$ | 2        | 25                 |
| gA6      | $5.80e4 \pm 8.9e3$ | $4.00 \pm 0.4$                  | $1.90 \pm 0.04$ | 2        | 25                 |
| sarA6    | $3.30e5 \pm 1.5e5$ | $0.90 \pm 0.1$                  | $2.00 \pm 0.02$ | 2        | 25                 |
| mA6      | $3.90e5 \pm 2.8e5$ | $0.50 \pm 0.3$                  | $1.80 \pm 0.02$ | 2        | 10, 25             |
| hA6      | $3.80e4 \pm 5.7e3$ | $2.90 \pm 0.3$                  | $1.50 \pm 0.03$ | 2        | 15, 25             |
| 107 hA4  | NA                 | NA                              | NA              | 2        | 25                 |

108

109 **Table S7. Thermodynamic parameters for binding of the A5cons and SIP**  
110 **peptides to hA5 ancestral reversion mutants.** Table entries show 95% credi-  
111 bility region from the posterior distribution of each parameter. Parameters are for  
112 a single-site binding model. “NA” parameters indicate that there was no detectable  
113 binding. All experiments were done at 25 °C.

| 114 protein | peptide | $K_A (\times 10^5 M^{-1})$ | $\Delta H^\circ (kcal/mol)$ | $fx comp.$                 |
|-------------|---------|----------------------------|-----------------------------|----------------------------|
| hA5         | A5cons  | $1.3 \leq 3.6 \leq 8.9$    | $-9.5 \leq -5.7 \leq -3.0$  | $0.71 \leq 0.84 \leq 0.97$ |
| hA5         | SIP     | NA                         | NA                          | NA                         |
| hA5/E2a     | A5cons  | $1.2 \leq 1.3 \leq 1.4$    | $-5.2 \leq -5.1 \leq -4.88$ | $0.87 \leq 0.90 \leq 0.93$ |
| hA5/E2a     | SIP     | NA                         | NA                          | NA                         |
| L44i        | A5cons  | $1.6 \leq 1.7 \leq 1.9$    | $-5.2 \leq -5.1 \leq -4.88$ | $0.87 \leq 0.90 \leq 0.93$ |
| 115L44i     | SIP     | NA                         | NA                          | NA                         |
| D54k        | A5cons  | $3.2 \leq 3.5 \leq 3.7$    | $-5.1 \leq -5.0 \leq -4.9$  | $1.15 \leq 1.17 \leq 1.19$ |
| D54k        | SIP     | NA                         | NA                          | NA                         |
| M78a        | A5cons  | $1.0 \leq 1.1 \leq 1.2$    | $-3.5 \leq -3.3 \leq -3.1$  | $1.24 \leq 1.28 \leq 1.32$ |
| M78a        | SIP     | NA                         | NA                          | NA                         |
| A83m        | A5cons  | $2.6 \leq 2.8 \leq 3.0$    | $-5.5 \leq -5.5 \leq -5.3$  | $1.52 \leq 1.53 \leq 1.55$ |
| A83m        | SIP     | $0.4 \leq 0.6 \leq 1.0$    | $-0.8 \leq -0.6 \leq -0.4$  | $0.99 \leq 1.22 \leq 1.54$ |

## 116 References

- 117 [1] Bertini I, Gupta SD, Hu X, Karavelas T, Luchinat C, Parigi G, et al. Solution  
118 Structure and Dynamics of S100A5 in the Apo and Ca<sup>2+</sup>-Bound States. JBIC  
119 Journal of Biological Inorganic Chemistry. 2009 Sep;14(7):1097–1107.
